# Supplementary material for: The Key Ingredient Acacetin in Weishu Decoction Alleviates Gastrointestinal Motility Disorder Based on Network Pharmacology Analysis
Source: Hindawi journal article supplement (doi:10.1155/2021/5265444), 2021-01-01
Supplement: f1 [file 5265444.f1.zip]

**Supplementary Table 1. A total of 15 active components in Weishu Decoction.**

| MOL ID    | Name                              | MW (Dalton) | AlogP | Hdon (n) | Hacc (n) | OB (%) |
|-----------|-----------------------------------|-------------|-------|----------|----------|--------|
| MOL002687 | Guanosine                         | 283.28      | -2.41 | 6        | 9        | 21.43  |
| MOL001955 | CHLOROGENIC ACID                  | 354.34      | -0.42 | 6        | 9        | 11.93  |
| MOL008698 | dihydrocapsaicin                  | 307.48      | 4.33  | 2        | 4        | 47.07  |
| MOL001927 | albiflorin                        | 480.51      | -1.33 | 5        | 11       | 12.09  |
| MOL009290 | calycosin-7-O-beta-D-glucoside    | 446.44      | 0.41  | 5        | 10       | 5.49   |
| MOL000392 | FORMONONETIN                      | 268.28      | 2.58  | 1        | 4        | 69.67  |
| MOL002563 | Galangin                          | 270.25      | 2.04  | 3        | 5        | 45.55  |
| MOL001941 | imperatorin                       | 270.3       | 3.65  | 0        | 4        | 34.55  |
| MOL000526 | Trehalose                         | 342.34      | -4.26 | 8        | 11       | 2.32   |
| MOL012951 | Guanosine cyclic monophosphate    | 345.24      | -1.98 | 5        | 11       | 3.76   |
| MOL000655 | loganic acid                      | 376.4       | -2.33 | 6        | 10       | 4.92   |
| MOL001955 | yl quinic acid (isomer of 831, 83 | 354.34      | -0.42 | 6        | 9        | 11.93  |
| MOL001689 | Acacetin                          | 284.28      | 2.59  | 2        | 5        | 34.97  |
| MOL000433 | FA 18:1+3O                        | 441.45      | 0.01  | 7        | 13       | 68.96  |
| MOL000537 | Matairesinol                      | 358.42      | 3.47  | 2        | 6        | 4.5    |

MW: molecule weight, ALogP: the value of partition coefficient between octanol and water, Hdon: hydrogen-bond acceptors, OB: Oral bioavailability, BBB: Blood brain barrier, DL: drug-likeness, FASA-, Fractional wa atoms with negative partial charge.

| BBB   | DL   | FASA- |
|-------|------|-------|
| -1.62 | 0.21 | 0.23  |
| -1.71 | 0.33 | 0.37  |
| 0.47  | 0.19 | 0.22  |
| -2.19 | 0.77 | 0.36  |
| -2.05 | 0.81 | 0.27  |
| 0.02  | 0.21 | 0     |
| -0.09 | 0.21 | 0.41  |
| 0.92  | 0.22 | 0.28  |
| -7    | 0.24 | 0.23  |
| -1.96 | 0.4  | 0.39  |
| -2.51 | 0.4  | 0.26  |
| -1.71 | 0.33 | 0.37  |
| -0.05 | 0.24 | 0.35  |
| -2.59 | 0.71 | 0     |
| -0.23 | 0.4  | 0.29  |

bond donors, Hacc: hydrogen-  
 ter accessible surface area of all
