# Supplementary material for: The Key Ingredient Acacetin in Weishu Decoction Alleviates Gastrointestinal Motility Disorder Based on Network Pharmacology Analysis
Source: Hindawi journal article supplement (doi:10.1155/2021/5265444), 2021-01-01
Supplement: f1 [file 5265444.f1.zip]

**Supplementary Table 2. A total of 460 target compounds in Weishu Decoction.**

| Active component | Node IDs |
|------------------|----------|
| Acacetin         | CYP1B1   |
| Acacetin         | CYP19A1  |
| Acacetin         | CA7      |
| Acacetin         | CA12     |
| Acacetin         | CA4      |
| Acacetin         | CBR1     |
| Acacetin         | ABCC1    |
| Acacetin         | ABCB1    |
| Acacetin         | TNKS2    |
| Acacetin         | TNKS     |
| Acacetin         | ESR1     |
| Acacetin         | ESR2     |
| Acacetin         | HSD17B2  |
| Acacetin         | CDK5R1   |
| Acacetin         | XDH      |
| Acacetin         | CCNB3    |
| Acacetin         | ACHE     |
| Acacetin         | CDK6     |
| Acacetin         | NOX4     |
| Acacetin         | AKR1B1   |
| Acacetin         | ABCG2    |
| Acacetin         | FLT3     |
| Acacetin         | HSD17B1  |
| Acacetin         | LCK      |
| Acacetin         | MAOA     |
| Acacetin         | ADORA1   |
| Acacetin         | ADORA2A  |
| Acacetin         | KIT      |
| Acacetin         | OPRD1    |
| Acacetin         | SYK      |
| Acacetin         | GSK3B    |
| Acacetin         | TTR      |
| Acacetin         | AKR1B10  |
| Acacetin         | ALOX15   |
| Acacetin         | ALOX12   |
| Acacetin         | CA2      |
| Acacetin         | PTPRS    |
| Acacetin         | PTGS2    |
| Acacetin         | CSNK2A1  |
| Acacetin         | CFTR     |
| Acacetin         | PLG      |
| Acacetin         | CA1      |
| Acacetin         | CA9      |
| Acacetin         | GRK6     |
| Acacetin         | MCL1     |
| Acacetin         | PIM1     |
| Acacetin         | ARG1     |
| Acacetin         | ALOX5    |
| Acacetin         | PARP1    |
| Acacetin         | APP      |
| Acacetin         | KDM4E    |
| Acacetin         | CDK1     |
| Acacetin         | GLO1     |
| Acacetin         | MMP9     |

|                  |         |          |
|------------------|---------|----------|
| Acacetin         |         | MMP2     |
| Acacetin         |         | MMP12    |
| Acacetin         |         | CD38     |
| Acacetin         |         | TOP1     |
| Acacetin         |         | ADORA3   |
| Acacetin         |         | PLA2G2A  |
| Acacetin         |         | NAE1     |
| Acacetin         |         | TYR      |
| Acacetin         |         | AMY1A    |
| Acacetin         |         | AHR      |
| Acacetin         |         | ESRRA    |
| Acacetin         |         | SLC22A12 |
| Acacetin         |         | TERT     |
| Acacetin         |         | PFKFB3   |
| Acacetin         |         | AR       |
| Acacetin         |         | MAOB     |
| Acacetin         |         | NOS2     |
| Acacetin         |         | IGF1R    |
| Acacetin         |         | EGFR     |
| Acacetin         |         | F2       |
| Acacetin         |         | ST6GAL1  |
| Acacetin         |         | SIGMAR1  |
| Acacetin         |         | BACE1    |
| Acacetin         |         | CALM1    |
| Acacetin         |         | CDK2     |
| Acacetin         |         | CYP1A1   |
| Acacetin         |         | CYP1A2   |
| Acacetin         |         | DAPK1    |
| Acacetin         |         | GPR35    |
| Acacetin         |         | MPG      |
| Acacetin         |         | MET      |
| Acacetin         |         | OPRM1    |
| Acacetin         |         | BCHE     |
| Acacetin         |         | AVPR2    |
| Acacetin         |         | AURKB    |
| Acacetin         |         | DRD4     |
| Acacetin         |         | MPO      |
| Acacetin         |         | PIK3R1   |
| Acacetin         |         | PYGL     |
| Acacetin         |         | SRC      |
| Acacetin         |         | PTK2     |
| Acacetin         |         | KDR      |
| Acacetin         |         | MMP13    |
| Acacetin         |         | MMP3     |
| Acacetin         |         | CA3      |
| Acacetin         |         | PLK1     |
| Acacetin         |         | CDK5     |
| Acacetin         |         | CCNB1    |
| Acacetin         |         | CCNB2    |
| dihydrocapsaicin |         | TRPV1    |
| dihydrocapsaicin |         | PTGS1    |
| dihydrocapsaicin | CYP1A2  | CNR1     |
| dihydrocapsaicin | ACHE    | SLC6A11  |
| dihydrocapsaicin | BCHE    | SLC6A13  |
| dihydrocapsaicin | SIGMAR1 | CHRM4    |
| dihydrocapsaicin | CNR1    | DRD3     |

|                  |          |          |
|------------------|----------|----------|
| dihydrocapsaicin | SLC6A11  | HDAC8    |
| dihydrocapsaicin | SLC6A13  | HDAC1    |
| dihydrocapsaicin | CHRM4    | HDAC6    |
| dihydrocapsaicin | DRD3     | CNR2     |
| dihydrocapsaicin | HDAC8    | ROCK2    |
| dihydrocapsaicin | HDAC1    | OPRK1    |
| dihydrocapsaicin | HDAC6    | SLC6A4   |
| dihydrocapsaicin | CNR2     | HDAC3    |
| dihydrocapsaicin | ROCK2    | CHRM2    |
| dihydrocapsaicin | OPRK1    | HRH2     |
| dihydrocapsaicin | SLC6A4   | MME      |
| dihydrocapsaicin | HDAC3    | ADRA2A   |
| dihydrocapsaicin | CHRM2    | ADRA2C   |
| dihydrocapsaicin | AR       | HRH1     |
| dihydrocapsaicin | HRH2     | HDAC10   |
| dihydrocapsaicin | MME      | EPHX2    |
| dihydrocapsaicin | ADRA2A   | HDAC11   |
| dihydrocapsaicin | ADRA2C   | SCN9A    |
| dihydrocapsaicin | HRH1     | CDC25A   |
| dihydrocapsaicin | HDAC10   | CDC25B   |
| dihydrocapsaicin | EPHX2    | DRD2     |
| dihydrocapsaicin | HDAC11   | HTR2A    |
| dihydrocapsaicin | SCN9A    | CHEK1    |
| dihydrocapsaicin | CDC25A   | RAF1     |
| dihydrocapsaicin | CDC25B   | FGFR1    |
| dihydrocapsaicin | DRD2     | BRAF     |
| dihydrocapsaicin | HTR2A    | CHRM1    |
| dihydrocapsaicin | CHEK1    | SLC6A2   |
| dihydrocapsaicin | RAF1     | MAPKAPK2 |
| dihydrocapsaicin | FGFR1    | NPY1R    |
| dihydrocapsaicin | BRAF     | CHRM5    |
| dihydrocapsaicin | DRD4     | CHRM3    |
| dihydrocapsaicin | CHRM1    | LIPG     |
| dihydrocapsaicin | SLC6A2   | ADRA2B   |
| dihydrocapsaicin | MAPKAPK2 | DYRK1A   |
| dihydrocapsaicin | NPY1R    | HSD17B3  |
| dihydrocapsaicin | CHRM5    | PLAU     |
| dihydrocapsaicin | CHRM3    | NEK1     |
| dihydrocapsaicin | LIPG     | YES1     |
| dihydrocapsaicin | ADRA2B   | EPHB4    |
| dihydrocapsaicin | CDK5R1   | HTR2B    |
| dihydrocapsaicin | DYRK1A   | MMP1     |
| dihydrocapsaicin | HSD17B3  | MTOR     |
| dihydrocapsaicin | PLAU     | PIK3CG   |
| dihydrocapsaicin | NEK1     | PIK3CA   |
| dihydrocapsaicin | YES1     | WEE1     |
| dihydrocapsaicin | EPHB4    | CXCR3    |
| dihydrocapsaicin | HTR2B    | KCNH2    |
| dihydrocapsaicin | MMP9     | SPHK2    |
| dihydrocapsaicin | MMP1     | SPHK1    |
| dihydrocapsaicin | MMP2     | FAAH     |
| dihydrocapsaicin | FLT3     | RET      |
| dihydrocapsaicin | MTOR     | CCR8     |
| dihydrocapsaicin | PIK3CG   | RELA     |
| dihydrocapsaicin | PIK3CA   | DPP7     |
| dihydrocapsaicin | WEE1     | ERN1     |

|                  |          |          |
|------------------|----------|----------|
| dihydrocapsaicin | CXCR3    | DUSP3    |
| dihydrocapsaicin | KCNH2    | HSP90AA1 |
| dihydrocapsaicin | SPHK2    | CDC7     |
| dihydrocapsaicin | SPHK1    | ODC1     |
| dihydrocapsaicin | FAAH     | SGK1     |
| dihydrocapsaicin | RET      | MYLK     |
| dihydrocapsaicin | CCR8     | LIMK1    |
| dihydrocapsaicin | RELA     | CDC42BPA |
| dihydrocapsaicin | DPP7     | TNK2     |
| dihydrocapsaicin | ERN1     | DMPK     |
| dihydrocapsaicin | DUSP3    | MMP7     |
| dihydrocapsaicin | HSP90AA1 | PKN2     |
| dihydrocapsaicin | CDC7     | TLR9     |
| dihydrocapsaicin | ODC1     | HTR1A    |
| dihydrocapsaicin | SGK1     | MPEG1    |
| dihydrocapsaicin | MYLK     | KAT2B    |
| dihydrocapsaicin | LIMK1    | F9       |
| dihydrocapsaicin | CDC42BPA | PDGFRB   |
| dihydrocapsaicin | TNK2     | SCD      |
| dihydrocapsaicin | DMPK     | PIK3CD   |
| dihydrocapsaicin | MMP13    | PIK3CB   |
| dihydrocapsaicin | MMP7     | STK17B   |
| dihydrocapsaicin | PKN2     | MAP4K4   |
| dihydrocapsaicin | TLR9     | TYMS     |
| dihydrocapsaicin | HTR1A    | DHFR     |
| dihydrocapsaicin | MPEG1    | SLC19A1  |
| dihydrocapsaicin | KAT2B    | SLC46A1  |
| dihydrocapsaicin | F9       | FOLR1    |
| dihydrocapsaicin | ADORA3   | FPGS     |
| dihydrocapsaicin | PDGFRB   | FOLR2    |
| dihydrocapsaicin | KIT      | GART     |
| dihydrocapsaicin | PFKFB3   | ATIC     |
| dihydrocapsaicin | SCD      | SLC5A1   |
| dihydrocapsaicin | PIK3CD   | IL2      |
| dihydrocapsaicin | PIK3CB   | ALDH2    |
| dihydrocapsaicin | STK17B   | TBXAS1   |
| dihydrocapsaicin | MAP4K4   | MGAM     |
| dihydrocapsaicin | CDK5     | HTR2C    |
| FA 18_1+3O       | TYMS     | ESRRB    |
| FA 18_1+3O       | DHFR     | MIF      |
| FA 18_1+3O       | SLC19A1  | PPARA    |
| FA 18_1+3O       | SLC46A1  | PON1     |
| FA 18_1+3O       | FOLR1    | CA6      |
| FA 18_1+3O       | HDAC8    | CA14     |
| FA 18_1+3O       | FPGS     | CA13     |
| FA 18_1+3O       | FOLR2    | CA5B     |
| FA 18_1+3O       | HDAC6    | CA5A     |
| FA 18_1+3O       | HDAC1    | DHODH    |
| FA 18_1+3O       | GART     | STS      |
| FA 18_1+3O       | ATIC     | ERCC5    |
| FA 18_1+3O       | NOS2     | FEN1     |
| FA 18_1+3O       | SLC5A1   | PTPN1    |
| FORMONONETIN     | IL2      | ALK      |
| FORMONONETIN     | CYP19A1  | AXL      |
| FORMONONETIN     | ALDH2    | MAPT     |
| FORMONONETIN     | ESR1     | TOP2A    |

|              |         |         |
|--------------|---------|---------|
| FORMONONETIN | CA12    | INSR    |
| FORMONONETIN | ADORA1  | APEX1   |
| FORMONONETIN | ADORA2A | IKBKB   |
| FORMONONETIN | TBXAS1  | NTRK2   |
| FORMONONETIN | MAOA    | CXCR1   |
| FORMONONETIN | MGAM    | PKN1    |
| FORMONONETIN | HTR2A   | NEK2    |
| FORMONONETIN | HTR2C   | CAMK2B  |
| FORMONONETIN | ESRRA   | AKT1    |
| FORMONONETIN | ESRRB   | NEK6    |
| FORMONONETIN | ABCG2   | KCNA3   |
| FORMONONETIN | CA7     | GABRB3  |
| FORMONONETIN | HSD17B2 | GABRA2  |
| FORMONONETIN | CA4     | MAPK14  |
| FORMONONETIN | CBR1    | ADORA2B |
| FORMONONETIN | SLC6A2  | NTRK1   |
| FORMONONETIN | ALOX12  | PDE10A  |
| FORMONONETIN | EGFR    | ADRA1B  |
| FORMONONETIN | TYR     | JAK2    |
| FORMONONETIN | XDH     | HDAC2   |
| FORMONONETIN | PFKFB3  | CSNK1D  |
| FORMONONETIN | ESR2    | FNTA    |
| FORMONONETIN | PTPRS   | PGGT1B  |
| FORMONONETIN | HSD17B1 | CCNE2   |
| FORMONONETIN | ABCB1   | TAAR1   |
| FORMONONETIN | ALOX15  | PTGER1  |
| FORMONONETIN | MIF     | MCHR1   |
| FORMONONETIN | PPARA   | GRM5    |
| FORMONONETIN | PTGS1   | PRKDC   |
| FORMONONETIN | TLR9    | PDE5A   |
| FORMONONETIN | MAOB    | BRS3    |
| FORMONONETIN | CA2     | TGFBR1  |
| FORMONONETIN | CA1     | PTK2B   |
| FORMONONETIN | NOX4    | GYS1    |
| FORMONONETIN | PON1    | GSK3A   |
| FORMONONETIN | TNKS2   | CLK4    |
| FORMONONETIN | TNKS    | HSF1    |
| FORMONONETIN | ACHE    | PDE8B   |
| FORMONONETIN | CA3     | PGR     |
| FORMONONETIN | CA6     | MAPK8   |
| FORMONONETIN | CA14    | CSNK1G1 |
| FORMONONETIN | CA13    | CCR2    |
| FORMONONETIN | CA5B    | PPOX    |
| FORMONONETIN | CA5A    | ADRA1A  |
| FORMONONETIN | DHODH   | PTGER4  |
| FORMONONETIN | STS     | PTGER2  |
| FORMONONETIN | ERCC5   | PTGER3  |
| FORMONONETIN | FEN1    | HCRTR2  |
| FORMONONETIN | RAF1    | HCRTR1  |
| FORMONONETIN | CA9     | SRD5A1  |
| FORMONONETIN | PTPN1   | MAP2K1  |
| FORMONONETIN | BACE1   | NAAA    |
| Galangin     | BCHE    | PTAFR   |
| Galangin     | XDH     | HRH3    |
| Galangin     | ACHE    | JAK1    |
| Galangin     | ADORA1  | TYK2    |

|          |          |         |
|----------|----------|---------|
| Galangin | CA7      | GABRA3  |
| Galangin | ADORA2A  | GABRG2  |
| Galangin | ADORA3   | FNTB    |
| Galangin | CA12     | GABRA1  |
| Galangin | CA4      | GABRA5  |
| Galangin | ABCB1    | CCNE1   |
| Galangin | CYP1B1   | HSPA8   |
| Galangin | AKR1B1   | HSPA5   |
| Galangin | CA2      | ADK     |
| Galangin | ABCG2    | DPP4    |
| Galangin | HSD17B2  | ADA     |
| Galangin | HSD17B1  | EIF4E   |
| Galangin | ALOX15   | GAPDH   |
| Galangin | ESR2     | HPRT1   |
| Galangin | NOX4     | PNP     |
| Galangin | FLT3     | CDC42   |
| Galangin | ABCC1    | RAC1    |
| Galangin | ALOX5    | AHCY    |
| Galangin | PIM1     | POLA1   |
| Galangin | CSNK2A1  | CDA     |
| Galangin | EGFR     | TYMP    |
| Galangin | ESRRA    | GAA     |
| Galangin | TYR      | OGA     |
| Galangin | IGF1R    | TK1     |
| Galangin | AURKB    | CCND1   |
| Galangin | KDR      | MAPK1   |
| Galangin | PLK1     | EHMT1   |
| Galangin | MET      | EHMT2   |
| Galangin | ALK      | FUCA1   |
| Galangin | AXL      | GRK1    |
| Galangin | CYP19A1  | GBA     |
| Galangin | CA1      | SETD7   |
| Galangin | CA9      | HK2     |
| Galangin | AHR      | HK1     |
| Galangin | KDM4E    | DAO     |
| Galangin | CDK1     | SRM     |
| Galangin | ALOX12   | PDCD4   |
| Galangin | ESR1     | CDK4    |
| Galangin | MAOA     | SLC37A4 |
| Galangin | SYK      | PRKCD   |
| Galangin | GSK3B    | PRKCA   |
| Galangin | CDK5R1   | NEU4    |
| Galangin | CCNB3    | PDE4D   |
| Galangin | CDK6     | PDE9A   |
| Galangin | CBR1     | PDE1B   |
| Galangin | GRK6     | CASP3   |
| Galangin | MAPT     | NEU3    |
| Galangin | TOP2A    | NEU2    |
| Galangin | INSR     | ENGASE  |
| Galangin | MYLK     | ECE1    |
| Galangin | APEX1    | ELANE   |
| Galangin | PFKFB3   | CASP6   |
| Galangin | TNKS2    | CASP7   |
| Galangin | TNKS     | CASP8   |
| Galangin | SLC22A12 | CASP1   |
| Galangin | PTPRS    | CASP2   |

|             |         |          |
|-------------|---------|----------|
| Galangin    | PTGS2   | EGLN1    |
| Galangin    | TTR     | ADAMTS5  |
| Galangin    | CFTR    | FTO      |
| Galangin    | AKR1B10 | DNMT3B   |
| Galangin    | IKBKB   | TREH     |
| Galangin    | NTRK2   | LGALS3   |
| Galangin    | PIK3CG  | LGALS9   |
| Galangin    | TERT    | SELP     |
| Galangin    | GLO1    | SLC29A1  |
| Galangin    | MMP9    | PPM1A    |
| Galangin    | MMP2    | MMP8     |
| Galangin    | SRC     | LGALS7   |
| Galangin    | PARP1   | VEGFA    |
| Galangin    | F2      | FGF1     |
| Galangin    | NAE1    | FGF2     |
| Galangin    | BACE1   | FDFT1    |
| Galangin    | LCK     | SERPINE1 |
| Galangin    | GPR35   | SQLE     |
| Galangin    | DAPK1   | MGMT     |
| Galangin    | MPG     | AGTR1    |
| Galangin    | CDK2    | HRAS     |
| Galangin    | ARG1    | SLC28A2  |
| Galangin    | MCL1    | PRKCG    |
| Galangin    | CXCR1   | PRKCB    |
| Galangin    | AVPR2   | PRKCE    |
| Galangin    | DRD4    | PRKCH    |
| Galangin    | MPO     | ADAM17   |
| Galangin    | PIK3R1  | SLC28A3  |
| Galangin    | PYGL    | IMPDH1   |
| Galangin    | PTK2    | MAP3K7   |
| Galangin    | MMP13   | ABL1     |
| Galangin    | MMP3    | EPHA2    |
| Galangin    | CA3     | MAP3K9   |
| Galangin    | CA6     | AURKA    |
| Galangin    | PKN1    | BTK      |
| Galangin    | CA14    | SSTR2    |
| Galangin    | NEK2    | SSTR4    |
| Galangin    | CAMK2B  | SSTR1    |
| Galangin    | AKT1    | SSTR3    |
| Galangin    | NEK6    | EIF4H    |
| Galangin    | CDK5    | PABPC1   |
| Galangin    | CCNB1   | TNF      |
| Galangin    | CCNB2   | PSEN2    |
| imperatorin | MAOA    | HPSE     |
| imperatorin | ACHE    | LGALS4   |
| imperatorin | KCNA3   | LGALS8   |
| imperatorin | BACE1   | FOLH1    |
| imperatorin | CYP1A2  | DRD1     |
| imperatorin | GABRB3  | ADRA1D   |
| imperatorin | GABRA2  | CYP2D6   |
| imperatorin | CYP19A1 | HTR6     |
| imperatorin | MAPK14  | HTR1B    |
| imperatorin | ADORA2B | RORC     |
| imperatorin | NOS2    | STAT3    |
| imperatorin | ADORA1  | PSENEN   |
| imperatorin | NTRK1   | NCSTN    |

|             |          |         |
|-------------|----------|---------|
| imperatorin | PDE10A   | APH1A   |
| imperatorin | ADRA2A   | PSEN1   |
| imperatorin | ADRA2C   | APH1B   |
| imperatorin | ADRA2B   | RNASE2  |
| imperatorin | ADRA1B   | RNASE1  |
| imperatorin | JAK2     | RARS    |
| imperatorin | HDAC3    | POLB    |
| imperatorin | HDAC2    | FBP1    |
| imperatorin | HDAC1    | FHIT    |
| imperatorin | CSNK1D   | RNASEL  |
| imperatorin | FNTA     | QARS    |
| imperatorin | PGGT1B   | DTYMK   |
| imperatorin | CCNE2    | HSPA1A  |
| imperatorin | TAAR1    | DNPH1   |
| imperatorin | PTGER1   | HLCS    |
| imperatorin | MTOR     | P2RX1   |
| imperatorin | PIK3CD   | P2RY6   |
| imperatorin | PIK3CB   | OGT     |
| imperatorin | PIK3CG   | P2RY1   |
| imperatorin | MCHR1    | P2RY11  |
| imperatorin | PIK3CA   | PARG    |
| imperatorin | GRM5     | SELL    |
| imperatorin | PRKDC    | NAALAD2 |
| imperatorin | PDE5A    | SHBG    |
| imperatorin | BRS3     | LYPLA1  |
| imperatorin | MAOB     | LYPLA2  |
| imperatorin | TGFBR1   | SLC6A3  |
| imperatorin | PTK2B    | GCGR    |
| imperatorin | FAAH     | HSD11B1 |
| imperatorin | GYS1     | UPP1    |
| imperatorin | GSK3A    | QDPR    |
| imperatorin | CLK4     | DNM1    |
| imperatorin | HSF1     | CLK1    |
| imperatorin | PDE8B    | DYRK1B  |
| imperatorin | DYRK1A   | PTGFR   |
| imperatorin | PGR      | PIM2    |
| imperatorin | MAPK8    | NR3C1   |
| imperatorin | MAPKAPK2 | ERBB2   |
| imperatorin | CSNK1G1  | HTR7    |
| imperatorin | CCR2     | PRKCZ   |
| imperatorin | PPOX     | CAPN1   |
| imperatorin | PIM1     | CHRNA4  |
| imperatorin | ADRA1A   | AKR1C3  |
| imperatorin | CA9      | PKD1    |
| imperatorin | PTGER4   | PITRM1  |
| imperatorin | PTGER2   | MMP14   |
| imperatorin | BCHE     | PPARG   |
| imperatorin | PTGER3   | ITK     |
| imperatorin | HCRTR2   | PNMT    |
| imperatorin | HCRTR1   | LNPEP   |
| imperatorin | CNR1     | JAK3    |
| imperatorin | CNR2     | BLK     |
| imperatorin | SRD5A1   | CDC25C  |
| imperatorin | PTGS1    | CSK     |
| imperatorin | PTGS2    | EPHB2   |
| imperatorin | MAP2K1   | PLA2G7  |



|             |        |        |
|-------------|--------|--------|
| imperatorin | NAAA   | BMX    |
| imperatorin | CA12   | LYN    |
| imperatorin | FLT3   | EPHA5  |
| imperatorin | PTAFR  | EPHA4  |
| imperatorin | HRH3   | TXK    |
| imperatorin | JAK1   | FGR    |
| imperatorin | TYK2   | EPHA6  |
| imperatorin | GABRA3 | PTK6   |
| imperatorin | GABRG2 | EPHB3  |
| imperatorin | FNTB   | EPHA3  |
| imperatorin | CDK2   | TYRO3  |
| imperatorin | GABRA1 | COQ8B  |
| imperatorin | GABRA5 | EPHA1  |
| imperatorin | CCNE1  | CHRNA2 |

---
