# Supplementary material for: The Key Ingredient Acacetin in Weishu Decoction Alleviates Gastrointestinal Motility Disorder Based on Network Pharmacology Analysis
Source: Mediators Inflamm. 2021 Sep 21;2021:5265444. doi: 10.1155/2021/5265444 (PMC8478590; doi:10.1155/2021/5265444)
Supplement: Supplementary Materials — Supplementary Table 1: a total of 15 active components in Weishu Decoction. Supplementary Table 2: a total of 460 target compounds in Weishu Decoction. [file 5265444.f1.zip]

Archive with 2 entries (2 files):
- Revised Supplementary Table 1.pdf
- Revised Supplementary Table 2.pdf
